# Supplementary material for: Trans-oral robotic surgery versus coblation tongue base reduction for obstructive sleep apnea syndrome
Source: PeerJ. 2019 Oct 2;7:e7812. doi: 10.7717/peerj.7812 (PMC6778434; doi:10.7717/peerj.7812)
Supplement: Data S1 — Medical charts were retrospectively reviewed for OSAS patients admitted for TORS or coblation tongue base reduction surgery between 2012 and 2017. 33 patients met the inclusion criteria. Detailed profiles were constructed for each patient and included several variables. [file peerj-07-7812-s001.xlsx]

## Sheet: Data
date	Group	age	sex	BMI	HTN	DM	CVA	CAD	FTP	TG	FS	DISE-V	DISE-O	DISE-T	DISE-E	MuRP	MuRL	preESS	preAHI	preAI	preSeverity	preminO2	preCT90	postAHI	AHIreduct	posAI	AIreduction	Success	postminO2	O2 impro	postCT90	CT90reduct	postESS	Hstay	NRS
1051210	0	48	1	21.4	0	0	0	0	3	1	3	2	1	2	1	3	1	8	42.6	22.4	3	77	2.7	35.3	7.3	15.2	7.2	0	81	4	2.1	0.6	9	4	2
1050910	0	37	1	24.3	0	0	0	0	4	2	3	2	2	2	0	2	1	16	50	25	3	87	4.1	48.6	1.4	39.1	-14.1	0	87	0	0.2	3.9	9	5	3
1050119	0	60	1	24.9	0	0	0	0	4	0	3	1	1	2	0	1	2	11	21.8	6.9	2	70	3	0.8	21	0	6.9	1	85	15	0.2	2.8	7	5	2
1060424	0	21	1	25.3	0	0	0	0	4	4	2	2	2	1	0	2	4	6	50	45	3	79	19.3	0	50	0	45	1	90	11	0	19.3	2	7	4
1060211	0	40	1	25.6	0	0	0	0	2	3	1	2	1	1	0	3	3	24	86.3	77.7	3	62	50.2	15.6	70.7	4.1	73.6	1	79	17	17.9	32.3	16	6	4
1060217	0	42	1	25.8	0	0	0	0	4	1	3	2	1	2	2	3	2	9	30.2	16.5	3	81	2.2	16.5	13.7	1.75	14.75	1	88	7	1	1.2	7	6	2
1050309	0	49	1	26.7	0	0	0	0	3	2	3	2	2	1	1	3	3	9	40.9	36.1	3	65	12.7	37.3	3.6	19.8	16.3	0	86	21	1.9	10.8	7	4	3
1050105	0	50	1	26.9	1	0	0	0	3	0	3	1	1	2	0	3	3	12	59.9	58.5	3	70	35.3	44.4	15.5	30.3	28.2	0	82	12	6.8	28.5	4	5	2
1051022	0	32	1	27.7	0	0	0	0	3	3	2	2	2	1	0	4	2	8	54.1	35.1	3	83	2	1.1	53	0	35.1	1	92	9	0	2	7	5	2
1030331	0	27	1	28.4	0	0	0	0	3	3	2	2	1	1	0	4	3	11	44.3	6.8	3	72	18.2	9.7	34.6	0	6.8	1	83	11	3.5	14.7	10	4	3
1050409	0	46	1	29.8	1	0	0	0	4	2	3	2	2	1	1	3	3	5	58.7	46.3	3	79	21.9	51.8	6.9	47.6	-1.3	0	74	-5	25	-3.1	2	8	4
1060102	0	29	1	30.8	0	0	0	0	3	0	3	2	1	1	1	4	3	12	49.9	39.5	3	69	35.1	38.9	11	36.8	2.7	0	78	9	14.7	20.4	11	7	2
1050908	0	62	0	31.3	0	0	0	0	4	2	3	2	1	2	0	4	4	10	28.3	15.4	2	71	4.8	18.3	10	2.69	12.71	1	84	13	1.2	3.6	10	5	4
1050507	0	34	1	32.1	0	0	0	0	4	3	2	2	2	2	1	4	2	17	27.9	25.3	2	73	5.2	43.7	-15.8	32.4	-7.1	0	76	3	5.8	-0.6	9	5	2
1051203	0	30	1	33.8	0	0	0	0	3	3	2	2	2	1	0	4	3	9	84	26	3	75	7	45.6	38.4	34.7	-8.7	0	82	7	11	-4	8	6	3
1050329	0	24	1	35.7	0	0	0	0	3	3	2	2	2	1	1	4	3	10	78.5	49.8	3	68	17.5	0.7	77.8	0	49.8	1	94	26	0.4	17.1	4	6	2
1020702	1	13	1	18.2	0	0	0	0	3	1	3	2	1	2	0	4	2	3	16.9	7.9	2	87	9.7	14.4	2.5	8.6	-0.7	1	86	-1	1.2	8.5	4	3	2
1050116	1	54	0	20.8	0	0	0	0	3	2	3	2	2	2	0	3	2	10	29.3	24.1	2	81	1.5	17	12.3	10.2	13.9	1	85	4	0.4	1.1	8	3	2
1010710	1	39	1	21.9	0	0	0	0	4	1	3	1	1	2	1	3	3	12	57	26	3	68	5	43.8	13.2	4.99	21.01	0	86	18	2.2	2.8	9	4	2
1050408	1	30	1	22.8	0	0	0	0	2	3	1	2	1	1	1	4	3	10	25.9	18.8	2	70	6.7	9.3	16.6	3.3	15.5	1	88	18	0.2	6.5	3	4	2
1050729	1	46	1	25.5	1	1	0	0	3	2	3	2	2	1	1	4	1	13	21.4	13.9	2	77	33.5	24.9	-3.5	0.26	13.64	0	81	4	4.2	29.3	8	5	4
1050819	1	48	1	25.6	0	0	0	0	4	2	3	2	1	2	0	4	3	2	29.4	24.5	3	80	1.5	4.3	25.1	0.6	23.9	1	84	4	0.5	1	1	5	2
1030108	1	39	1	25.7	0	0	0	0	4	2	3	2	2	1	0	3	2	9	47.7	41.9	3	80	11.9	8.2	39.5	0.8	41.1	1	88	8	1.7	10.2	6	5	2
1050527	1	52	0	25.9	0	0	0	1	4	2	3	2	2	1	0	3	2	23	14.4	2.3	1	85	0.6	1.5	12.9	0.7	1.6	1	92	7	0	0.6	14	5	2
1030429	1	49	1	26.3	0	0	0	0	3	2	3	2	1	1	0	4	1	9	89.7	80.9	3	72	43.8	39.7	50	27.4	53.5	1	83	11	6.7	37.1	6	4	3
1050902	1	45	1	26.9	1	0	0	0	4	1	3	1	2	2	1	3	2	14	19.5	8	2	84	1.1	35.2	-15.7	10.1	-2.1	0	82	-2	4.6	-3.5	16	4	2
1011106	1	24	1	27.4	1	0	0	0	3	1	3	1	2	2	0	4	3	13	23.1	11.8	2	73	8.8	41.8	-18.7	32	-20.2	0	52	-21	31.5	-22.7	10	5	4
1021210	1	47	0	28.8	1	0	0	0	3	1	3	2	2	1	0	4	2	10	39.9	35	3	60	9	8.8	31.1	1.6	33.4	1	86	26	0.4	8.6	12	4	3
1051210	1	28	1	29.4	0	0	0	0	3	1	3	1	2	2	0	4	4	3	17.8	9.1	2	85	0.6	11.7	6.1	1.07	8.03	1	81	-4	0.7	-0.1	3	4	2
1050115	1	42	1	32	1	0	0	0	4	3	2	2	1	2	0	4	3	17	68.2	36.9	3	69	21.4	35.1	33.1	22.2	14.7	0	76	7	7.4	14	20	5	3
1060303	1	46	1	33.1	1	0	0	0	4	3	2	2	1	1	0	2	2	14	84.3	77	3	55	12.3	42.8	41.5	2.2	74.8	0	84	29	4.6	7.7	2	5	2
1060113	1	29	0	33.2	0	0	0	0	3	3	2	2	2	2	1	4	2	11	81	25.2	3	76	5.1	1.5	79.5	0.16	25.04	1	91	15	0	5.1	2	4	3
1020226	1	27	1	41.9	0	0	0	0	3	2	3	2	2	1	1	4	2	12	97.1	89.6	3	56	50	92.6	4.5	88.7	0.9	0	46	-10	72.6	-22.6	13	5	3

## Sheet: Codeing
Items	Meaning
date	OP day	YYYMMDD
Group	Operation group	0=TORS group; 1=coblation group
age	age
sex	sex	Female=0, Male=1
BMI	BMI
preESS	Pre-OP Epworth sleepiness scale	0-24
preOP	Previous surgery for apnea	0=no, 1=yes
HTN	HTN	0=no, 1=yes
DM	DM	0=no, 1=yes
CVA	CVA	0=no, 1=yes
CAD	CAD	0=no, 1=yes
FTP	Friedman tongue position
TG	Tonsil grade	0-4
FS	Friedman staging
MuRP	Muller-Retropalatal collpase	0-25%=1,26-50%=2,51-75%=3, 76%-100=4; lateral=L, anterior-posterior=AP, circumferential=CF
MuRL	Muller-Retrolingual collapse	0-25%=1,26-50%=2,51-75%=3, 76%-100=4; lateral=L, anterior-posterior=AP, concentric=C
MuSG	Muller-supraglottic collapse	0-25%=1,26-50%=2,51-75%=3, 76%-100=4; lateral=L, anterior-posterior=AP, concentric=C
preAHI	Pre-OP apnea-hypopnea index	times/hr
preAI	Pre-OP apnea index	times/hr
preSeverity	Pre-OP OSAHS severity	Mild=1,moderate=2, severe=3
preminO2	Pre-OP minimal SpO2	%
preCT90	cumulative time percentage with SpO2<90%
DISE-V	DISE-Velum collapse	No obstruction=0, partial obstruction=1, total obstruction=2, lateral=L, anterior-posterior=AP, concentric=C
DISE-O	DISE-Oropharynx collapse	No obstruction=0, partial obstruction=1, total obstruction=2; lateral=L
DISE-T	DISE-tongue base collapse	No obstruction=0, partial obstruction=1, total obstruction=2; anterior-posterior=AP
DISE-E	DISE-epiglottis collapse	No obstruction=0, partial obstruction=1, total obstruction=2lateral=L, anterior-posterior=AP
postAHI	Post OP AHI
AHIreduct	PreAHI-postAHI
postAI	Post OP AI(apnea index)
Aireduction	PreAI-postAI
Success	OP success	50 % reduction of pre-OP AHI and AHI<20è
		0=fail, 1=sucess
postminO2	Post-OP minimal SpO2
O2 impro	PostminO2-preminO2
postCT90	PostOP cumulative time percentage with SpO2<90%
CT90reduct	preCT90-postCT90
preESS	Pre-OP Epworth sleepiness scale
postESS	Post-OP Epworth sleepiness scale
ESSreduct	PreESS-postESS
postAI-RES	post-OP Arousal index-Respiratory related	times/hr
Hstay	Hospital stay	days
NRS	pain score on day 1	0-10

## Sheet: Sheet3
0.171362	17.1362
0.028	2.8
0.963303	96.3303
1	100
0.819235	81.9235
0.453642	45.3642
0.0880196	8.80196
0.258765	25.8765
0.979667	97.9667
0.781038	78.1038
0.117547	11.7547
0.220441	22.0441
0.353357	35.3357
0	0
0.457143	45.7143
0.991083	99.1083
0.147929	14.7929
0.419795	41.9795
0.231579	23.1579
0.640927	64.0927
0	0
0.853741	85.3741
0.828092	82.8092
0.895833	89.5833
0.557414	55.7414
0	0
0	0
0.779449	77.9449
0.342697	34.2697
0.485337	48.5337
0.492289	49.2289
0.981481	98.1481
0.046344	4.6344
